# Supplementary material
Source: PubMed Central journal article supplement (PMC4163508)
Supplement: NIHMS596814-supplement-1.pdf [file NIHMS596814-supplement-1.pdf]

## Supplemental Data

### Supplemental figure legends and Tables

**Supplemental Figure 1** GM-CSF does not activate the GM-CSFR signaling pathway in chronic lymphocytic leukemia (CLL) cells. **(A)** Western blot analysis of peripheral blood (PB) CLL cells. As shown, a 24-hour incubation of CLL low-density cells with increasing concentrations of GM-CSF did not induce tyrosine phosphorylation of STAT3 or STAT5 or affect the phosphorylation status of AKT or ERK. As positive controls (c), protein extracts of HeLa (for STAT3 and STAT5) and Jurkat (for AKT and ERK) cells were used. **(B)** JAK2 immunoprecipitation and detection of phosphotyrosine JAK2 following proteins separation by SDS-PAGE. CLL cells were incubated with increasing concentrations of GM-CSF as described above, and following immunoprecipitation, pJAK2 was detected using mouse anti-human antibodies. As shown, pJAK was not detected following incubation with GM-CSF (I.P., immunoprecipitate; B, beads control). **(C)** Flow cytometry analysis of CLL cells incubated with GM-CSF or GM-CSFR neutralizing antibodies. CLL cells were incubated with 100 ng GM-CSF for 24 or 48 h. As shown in the upper panel, incubation with GM-CSF did not increase the levels of the cell surface protein CD20, and as shown in the lower panel, incubation of CLL cells with GM-CSFR $\alpha$  antibodies for 24 hours did not affect cell surface CD20 levels.

**Supplemental Figure 2** Sequence of the 5'-flanking region of the human GM-CSFR $\alpha$  promoter. Analysis of the promoter region was performed using the TFSEARCH (Transcription factor Search) version 1.3 and TESS (Transcription Element Search System) version 6.0 software. Based on the findings from the above search, we designed the primers and probes to identify which of the GAS-like elements binds STAT3. The putative STAT3 binding sites in the proximal region of the GM-CSFR $\alpha$  promoter are shown in red, and those in the distal region of the GM-CSFR $\alpha$  promoter are shown in underlined black. Green denotes the first exon region, and blue denotes a TG-rich sequence.

**Supplemental Figure 3** Sequence of the 5'-flanking region of the human GM-CSFR $\alpha$  promoter. The putative STAT3-binding sites that we studied are highlighted in red.

**Supplemental Figure 4** The proteins pulled-down together with GM-CSFR $\alpha$  and detected by mass spectrometry analysis.

**Supplemental Table 1. Patient Characteristics**

| CLL<br>pt. # | Sex | Age<br>(yr) | WBC<br>(10 <sup>9</sup> /l) | BM          |               | Plts.<br>(10 <sup>9</sup> /l) | Rai<br>stage | $\beta_2$ M<br>(mg/dl) | V <sub>H</sub><br>mutation | Cytogenetics<br>/FISH |
|--------------|-----|-------------|-----------------------------|-------------|---------------|-------------------------------|--------------|------------------------|----------------------------|-----------------------|
|              |     |             |                             | Lymph.<br>% | Hb.<br>(g/dl) |                               |              |                        |                            |                       |
| 1            | F   | 70          | 23                          | 78          | 14            | 354                           | 0            | 2.3                    | N                          | 13q                   |
| 2            | M   | 61          | 17                          | 68.4        | 16.7          | 164                           | 1            | 1.6                    | Y                          | T12                   |
| 3            | M   | 69          | 57.1                        | 73          | 13.3          | 166                           | 1            | 3.8                    | Y                          | ND                    |
| 4            | M   | 56          | 48.3                        | 79          | 13.1          | 236                           | 1            | 2                      | Y                          | 46, XY                |
| 5            | F   | 65          | 33                          | 80          | 12.8          | 310                           | 0            | 2.5                    | Y                          | ND                    |
| 6            | M   | 70          | 33                          | 65          | 15.6          | 192                           | 1            | 4.7                    | N                          | 46,XY                 |
| 7            | M   | 64          | 21.4                        | ND          | 14.6          | 243                           | 0            | 2.5                    | ND                         | 46,XY                 |
| 8            | M   | 85          | 24                          | 57          | 12.4          | 163                           | 1            | 3.9                    | Y                          | 13q                   |
| 9            | F   | 46          | 55.8                        | 58          | 13.4          | 248                           | 1            | 2.2                    | Y                          | 13q                   |
| 10           | F   | 81          | 47.3                        | 69          | 11.9          | 132                           | 1            | 4.1                    | N                          | 11q                   |
| 11           | F   | 69          | 116.8                       | 84          | 13            | 169                           | 1            | 2.9                    | Y                          | 13q                   |
| 12           | M   | 68          | 26.8                        | 52          | 14.7          | 251                           | 1            | 2.2                    | N                          | 13q                   |
| 13           | M   | 78          | 40.9                        | 58          | 14.6          | 169                           | 1            | 2                      | Y                          | 13q                   |
| 14           | M   | 70          | 17.4                        | 54          | 14.8          | 147                           | 1            | 1.9                    | Y                          | 13q                   |
| 15           | F   | 67          | 14.8                        | 77          | 11.4          | 535                           | 1            | 1.8                    | Y                          | 46,XX                 |
| 16           | F   | 59          | 50.9                        | 63          | 14.2          | 306                           | 1            | 2                      | Y                          | 46,XX                 |
| 17           | M   | 57          | 85.9                        | 82          | 15.1          | 241                           | 1            | 2.5                    | N                          | 46,XY                 |
| 18           | M   | 82          | 139.1                       | 79          | 12.7          | 122                           | 1            | 3.9                    | Y                          | T12                   |
| 19           | F   | 69          | 28.7                        | 80          | 12.4          | 119                           | 2            | 4.4                    | Y                          | T12                   |

Abbreviations; Yr., years; WBC, white blood cells; lymph., Lymphocytes; Hb, hemoglobin; Pts., platelets;  $\beta_2$ M,  $\beta_2$  microglobulin; M, male F, female; ND, not done or not available; V<sub>H</sub> mutation, hypermutation of the immunoglobulin heavy chain gene presented as N (negative; if % derivation from the germline sequence is  $\leq$  2%); or Y (positive, if % derivation from germline sequence is > 2%); FISH, fluorescence in situ hybridization.

## Supplemental Table 2 Primers and Probes

### Primers used in the luciferase assay

Hu-GM-CSF -4012-5 GCG GGT ACC GGT GAA AGT CAG AAA CAG GGT  
Hu-GM-CSF -2965-5 GCG GGT ACC CGT TGT TGG ACA TTT AGG TTG  
Hu-GM-CSF -2517-5 GCG GGT ACC GAA TGG ACT AAG ACA GCT CCT  
Hu-GM-CSF -496-5 GCG GGT ACC TGT ATG CCC ATG TGC ACT GTG  
Hu-GM-CSF -23-3 GCG AGA TCT CTT CTG AGT AGC TCC CTT CAG

### Primers used for the ChIP assay

GM-CSF-1-F -3605 ATT CTC AGT TTC CAG GAG AGC  
GM-CSF-1-R AGA CAT TGT GTG TGG AGA GAC -3502  
GM-CSF-2-F -3418 GGA GAA CCA CTA TGA GCC GAA  
GM-CSF-2-R GTG CAC ACG TAC CCT AGA ACT -3259  
GM-CSF-3-F -3018 GCT GCA TAG TAT TCC ATG GTG  
GM-CSF-3-R CAA CCT AAA TGT CCA ACA ACG -2945  
GM-CSF-4-F -2551 TAC CCA ACC TCA GGT ATT CCT  
GM-CSF-4-R GCA AAG GTG AAA GAT GGC TGA -2436  
GM-CSF-5-F -94 CAA TGA ACT CAC GGA GCA AT  
GM-CSF-5-R CCC TTC AGA GTT CCT CTG TGT C +9

### Probes used for EMSA

Probe-1 GAGCTGG -3581 TTGTTGAAAA -3572 GACCC  
Probe-1-mutant GAGCTGG -3581 TAGAAG AAAA -3572 GACCC  
Probe-3 TGCCACA -2984 TTTTCTTAA -2976 TCCAGTC  
Probe-3-mutant TGCCACA -2984 TAAACTT AA -2976 TCCAGTC  
Probe-5 TTACAGG -68 TTTCCCAA -61 TCCTATGAAA  
Probe-5-mutant TTACAGG -68 TGGCCCAA -61 TCCTATGAAA  
Probe-2 TTACC -3372 TTTTTTTAAAAA -3383 TTTTA  
Probe-4 ATCAA -2551 TTACCCAA TTTCCAGCAA -2521 CATGA

## Supplemental Methods

### ***Expression of Human GM-CSFR $\alpha$ in 293FT Cells***

To characterize the epitope specificity of the GM-CSFR $\alpha$  antibody and to explore the intracellular localization of GM-CSFR $\alpha$ , we used CLL-cell DNA to generate full-length (amino acids 1–400) GM-CSFR $\alpha$  and its extracellular (amino acids 1–323) and intracellular (amino acids 347–400) regions in 293FT cells. To generate these constructs, we designed primers containing overhangs that included restriction sites for *Hind*III or *Bam*HI on the 5' and 3' end, a Kozac sequence upstream of the ATG start codon to enhance the efficiency of the *expression in mammalian cells, and a start codon*. The primers used were full-length (from the start codon ATG to 1492bp): forward, 5'-GCGGCGAAGCTTCGCCACCATGCTTCTCCTGGTGACAAGC-3' and reverse, 5'-GCGGCGGGATCCGGTAATTCCTTCACGGTCAAG-3'; the primers for the extracellular domain (from ATG to 1261bp) were forward, 5'-GCGGCGAAGCTTCGCCACCATGCTTCTCCTGGTGACAAGC-3' and reverse, 5'-GCGGCGGGATCCGCCGAGGTTCCCGTCGTAG-3'; and the primers for the intracellular domain (from 1331bp to 1492bp) were forward, 5'-GCGGCGAAGCTTCGCCACCATGAAAAGGTTCTTAGGATACAG-3' and reverse, 5'-GCGGCGGGATCCGGTAATTCCTTCACGGTCAAG-3'. For the fusion of GFP, we mutated the stop codon for the full-length and intracellular domain of human GM-CSFR $\alpha$ . GFP was pre-cloned into pcDNA3 vector at the *Bam*HI/*Xho*I site. Human GM-CSFR $\alpha$  and its truncated fragments were cloned into the *Hind*III/*Bam*HI site. After verifying each cloned cDNA by direct sequencing, the full-length and the GM-CSFR $\alpha$  fragments were transfected into 293FT cells using Lipofectamine 2000 (Invitrogen) and incubated for 72 hours, in accordance with the manufacturer's instructions. Following incubation, the cells were harvested, and transfection efficiency was assessed by flow cytometry.

### ***Epitope Mapping of the GM-CSFR $\alpha$ Antibodies***

The coding sequences of full-length extracellular and intracellular GM-CSFR $\alpha$  domains were generated by PCR and cloned into a mammalian expression system using the pcDNA 3.1 vector (Invitrogen) as described above. The pcDNA3.1 vector was modified by adding the sequence coding of GFP. Human 293FT cells were transfected using recombinant plasmids, incubated for 72 hours, and their cell pellets stored at -80°C and analyzed by Western immunoblotting using anti-GFP antibodies.

### ***Photoactivatable Ribonucleoside-Enhanced Crosslink and Immunoprecipitation (PAR-CLIP)***

We used the PAR-CLIP method to incorporate the photoreactive ribonucleoside analog 4-thiouridine into nascent RNA transcripts of 293FT cells. GFP-tagged human GM-CSFR $\alpha$  was expressed in 293FT cells as described above. The cells were incubated overnight in DMEM supplemented with 10% FBS in the presence of 100  $\mu$ M of 4-thiouridine (4SU, Sigma-Aldrich). Viable cells were washed with cold PBS, exposed to 302-nm UV light for 1 minute, lysed in NP-40 lysis buffer on ice for 10 minutes, and digested with 1 U/ $\mu$ l of RNase T1 (Invitrogen/Ambion) at room temperature for 15 minutes. Sepharose beads coated with anti-GFP antibodies (Abcam) were washed, suspended in RNase T1-treated cell lysates, and incubated overnight on a rotating shaker. Then the beads with the captured proteins were washed in washing buffer and digested with 100 U/ $\mu$ l of RNase T1 for 15 minutes at room temperature. Treated beads were washed with high-salt wash buffer 3 times and resuspended with Proteinase K buffer followed by Proteinase K (Roche) at 55°C for 30 minutes. Total RNA was extracted by using TRIzol LS reagent (Invitrogen). The cDNA library was prepared with a SuperScript Double-Stranded cDNA Synthesis kit (Invitrogen) for Illumina Next Generation Sequencing.

### ***Bioinformatics and Data Analysis***

To align RNA sequence reads to the reference human genome 19 (Hg19; February 2009, GRCh37 (<http://www.ncbi.nlm.nih.gov/projects/genome/assembly/grc/index.shtml>)), we used the Partek Flow software (version 2.1, 2012; Partek) bowtie algorithm. Annotated mRNA reads were exported to the Partek Genomic Suite Package (version 6.6, 2012; Partek) for downstream analysis. To identify differentially expressed genes, we used the 1-way ANOVA and the Benjamini-Hochberg correction for multiple comparisons with a false discovery rate of 0.05, and we created a heat map with an average-linkage clustering of selected genes. To identify pathways enriched for differentially expressed genes in the 2 experimental conditions, we used the KEGG pathway database (<http://www.genome.jp/kegg/pathway.html>).

### ***Mass Spectrometry Analysis***

The silver-stained bands from the pull-down assay were destained and subjected to in-gel digestion with 200 ng of modified trypsin (sequencing grade, Promega) at 37°C for 24 hours. The resulting peptides were analyzed by nano-liquid chromatography-coupled ion trap mass spectrophotometry with online desalting on a system consisting of a FAMOS autosampler, an UltiMate Nano liquid

chromatography module, and a Switchos precolumn switching device on a 75- $\mu\text{m}$  by 150-mm  $\text{C}_{18}$  column (all from Dionex). Electrospray ion trap mass spectrometry was performed on a LTQ linear ion trap mass spectrometer (Thermo Scientific). Resulting proteins were then identified by a database search for the fragment spectra using the National Center for Biotechnology Information nonredundant protein database, using Mascot (Matrix Science) and SEQUEST (Thermo Scientific) results. Resulting peptide matches were manually curated.

### ***Apoptosis Assay***

The rate of cellular apoptosis was analyzed using double staining with a Cy5-conjugated Annexin V kit and PI (BD Biosciences), according to the manufacturer's instructions. Briefly,  $1 \times 10^6$  cells were washed once with PBS and suspended in 200  $\mu\text{l}$  of binding buffer with 0.5  $\mu\text{g}/\text{ml}$  of Annexin V-Cy5 and 2  $\mu\text{g}/\text{ml}$  of PI. After incubation for 15 minutes in the dark at room temperature, the samples were analyzed on a FACSCalibur flow cytometer (Becton Dickinson). Cell viability was calculated as the percentage of Annexin V-positive cells, and statistical analysis was performed using the CellQuest Pro program.

**Fig. S1**

**A**

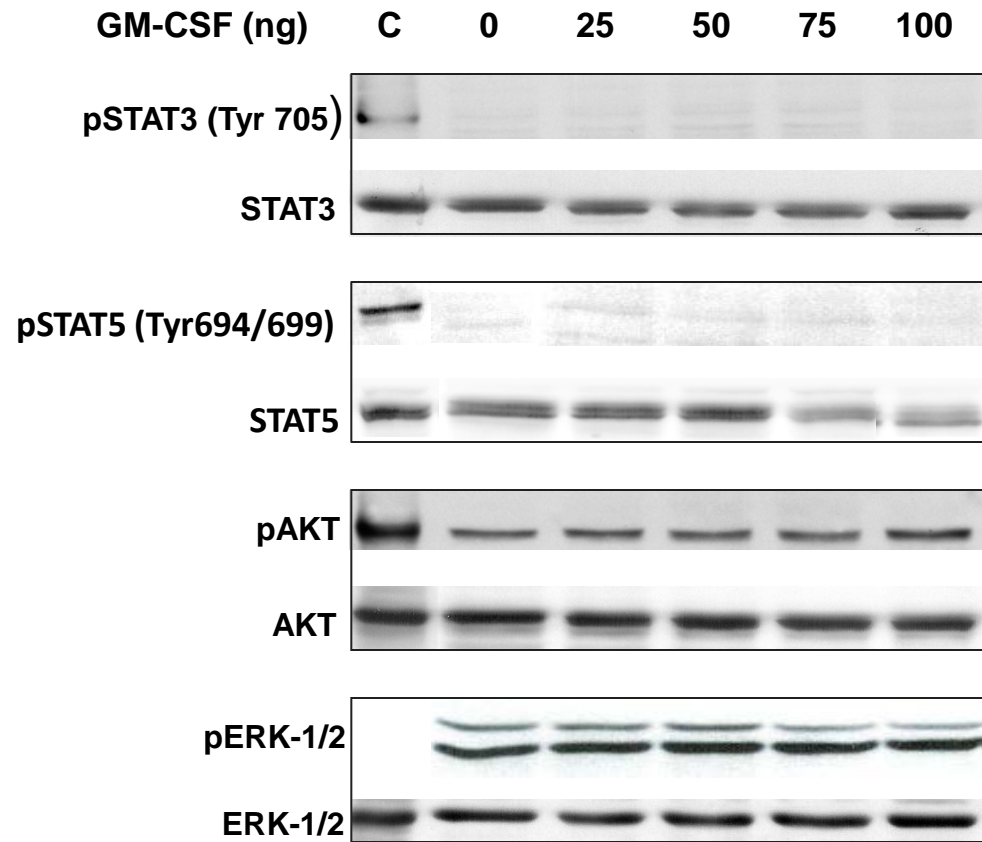

**B**

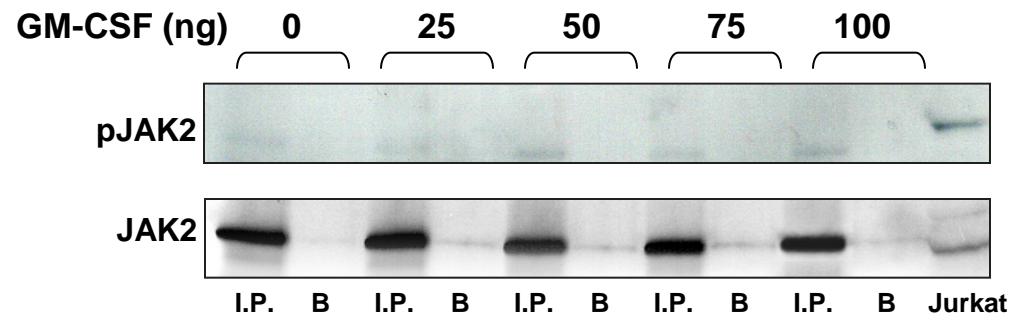

Fig. S1

C

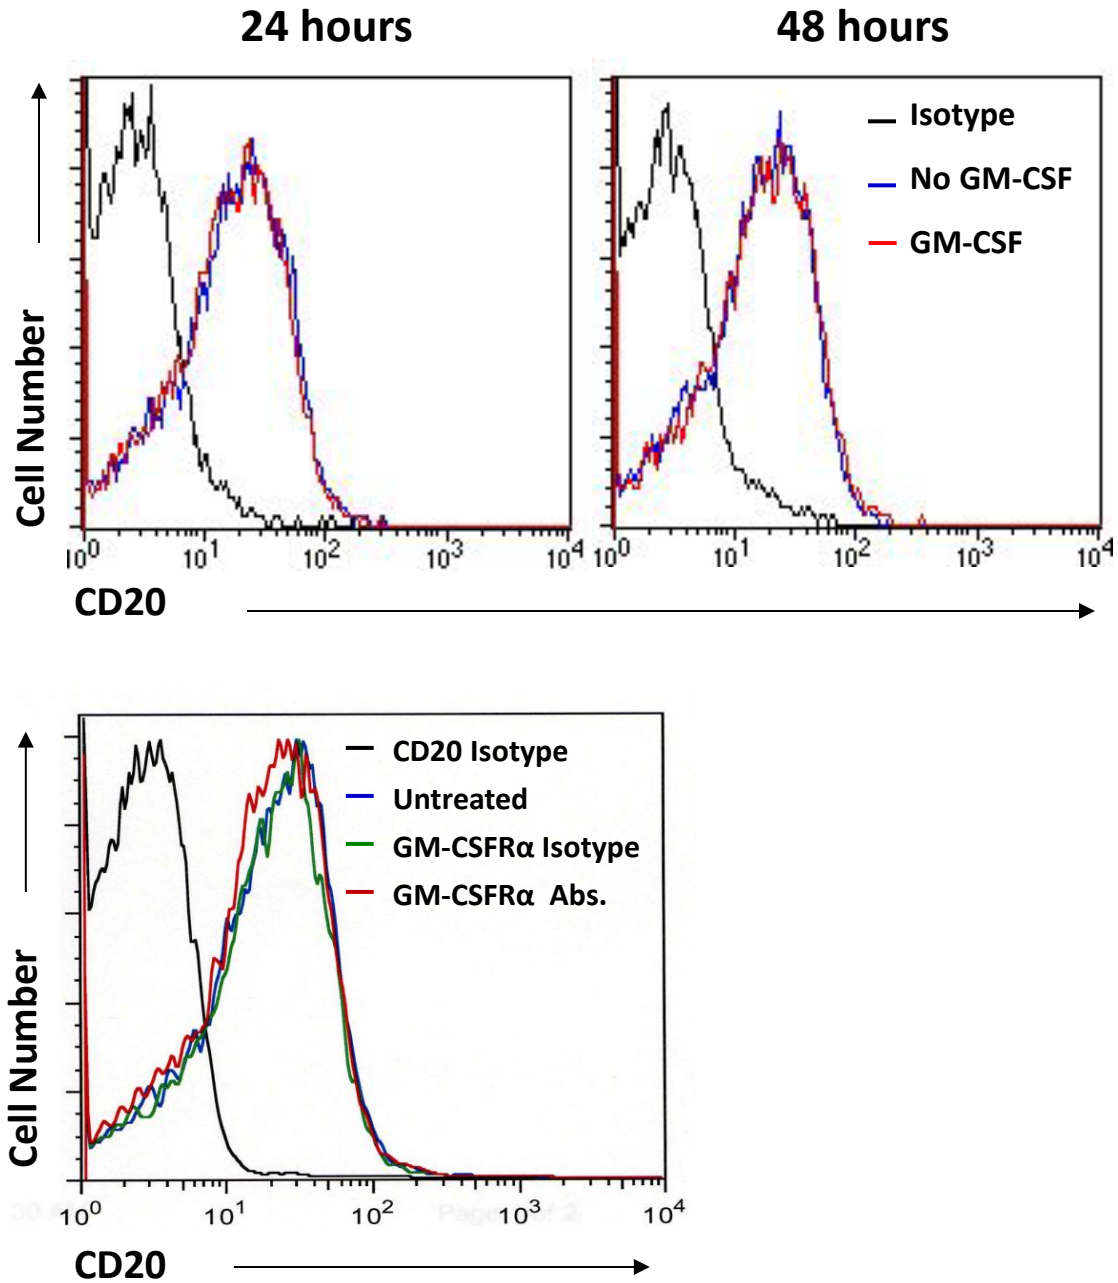



Fig. S2

-5000 ACAGTGCCAGTTCCAGCAGCC**TTGGTGAA**CCGTCTGGTTGAGCTCTTGGGAAGATAAACT -4941 -2480 TAAGACGGTAGAGGTGCAGCCTGGTCAGCCATCTTTACCTTTGCTGATGTTGCTATCCA -2421

-4940 TCCTACATCAATGTCAAAAAGGAAGATATGAGCC**TTTGACAA**GAATATCCACCATGATGTC -4881 -2420 GGTGTTTTCCATTGCATGTGCATGAAGCCCTATGCCTTTGTTTAGGCCCAACTGTTAGTA -2361

-4880 CCAGTCCAGCAGCCTGGGTGAGCCATCTGGTTGAGCTCTTGGGAAGATAAACTTCTCTA -4821 -2360 TCGTAACACATGTCACAGTCTGTTTGGTTGTTTTTTTTTTGAGACGGAGTTTTGCTCTTGTG -2301

-4820 CATCAATGTCAACAAGAAGATATGAGCC**TTTGACAAAA**AGATCCACCATGATGCCAGTT -4761 -2300 CCCAGGCTGGAGGGCAATGGCACCATCTCAGTCACTGCAACCTCCATCTCCTGGTTCA -2241

-4760 CCAGCAGCCTGGGTGAGCCATCTGGTTGAGCTCTTGGGAAGATAAACTTCTCTACATCAA -4701 -2240 AGGGATTCTCCTGCCTCAGCCTCCTGAGTAGCTGGGATTACAGGCACTCGCCACCACGCC -2181

-4700 TGCAACAAGAAGATATGAGCC**TTTGACAAAA**AGATCCACCGTGATGCCAGTCCAGCA -4641 -2180 TGGCTAATTTTTGTATTTTTTTTTTTTTTTAGTGAGCCACTGCCCTGGCCTGCGTGATGTT -2121

-4640 GCCTGGCTGAGCCATCTGGTTGAGCTCTTGGGAAGATAAGCTTCTCTACATCAATGTCAA -4581 -2120 TCTTATGATTTTTGTAGACAGCACAAGGCCATCTGTATTTGTGTGTGCAAGTGTCTGT -2061

-4580 CAAGAAGATATGAGCC**TTTGACAAAA**AGATCCACCGTGATGCCAGTCCAGCAGCCTGG -4521 -2060 GCAGGTGTGTGTACACCAATATGCTTTGTGCAGAGGCGTGTGCAGATGTGTGTGATGTT -2001

-4520 CTGAGCCATCTGGTTGAGCTCTTGGGAAGATAAACTTCTCTACATCAATGTCAACAAGAA -4461 -2000 GTGTATGGATAGGTGCACGTGTGTGCAGGTGTGTGGGGATGTGTGTGTGCAGGTCTGTGTG -1941

-4460 GATATGAGCC**TTTGACAAAA**GATCCACCATGATGCCAGTCCAGCAGCCTGGCTGAGC -4401 -1940 TGCAGACATGCACGTGTATGCAGGTGTGTGTGTGTACAGATGTGTGTGCAGGTGTGTG -1881

-4400 CATCTGGTTGAGCTCTTGGGAAGATAAACTTCTCTACATCAATGTCAACAAGAAGATATG -4341 -1880 TGCAGATGTGTGTGTAGTTGTGTGTATGCACATGTGCATTGTGTGCAGGTGTGTGGGGAT -1821

-4340 AGCC**TTTGACAAAA**GATCCACCATGATGCCAGTCCAGCAGCCTGGCTGAGCCATCTG -4281 -1820 GTGTGTGTGCAGGTCTGTGTGTGCAGACATGCATGTGTATGGAGTGTGTGTACAGACGT -1761

-4280 GTTGGCTCTTGGGAAGATAAACTTCTCTACATCAATGTCAACAAGAAGATATGAGCC**TT** -4221 -1760 GCGTGTAGGTGTGTGTGCATGTGTGTGTGTGCAGATGTGTGTATGCACATGTGCACACTGTG -1701

-4220 **TGACAAAA**AGATCCACCATGATGCCAGTCCAGCAGCCTGGCTGAGCCATCTGGTTGAA -4161 -1700 TGCAGGTGTGTGAGGATGTGTGTGTGCAGGTCTGTGTGTGCAGACATGCCTGTGTGTGCA -1641

-4160 **TTCTTGGGAA**GATAAACTTCTTTACATTTGATGTCAACAACAGGGCATGA**TTCA**TTAAAG -4101 -1640 GGTCTGTGTGTGCAGACATGCATGTGTATGCAGGTGTGTGTGTGTACAGATGTGTGTGCA -1581

-4100 CAAAAGGCCCATTTATGTGCCCACTTCCAGCAGCCTTGGTGAGTCACTGATTTGGCTC -4041 -1580 GGTGTGTGTTTGCAGATGTGTGTGCAGATGTGCATGTGCCTTGTGTATATGCACATGTG -1521

-4040 TTGGAAAGACAAACTTCTCTACATGATGGTGAAGTTCAGAAACAGGGATGAGCCATTG -3981 -1520 CACTGTGTGCAGGTGTGTGTGTGTACAGATATGTGTGCAGGTGTGTGTGCAGATGTGCTT -1461

-3980 ACAAGCAGACCCACTATAGTTTGCAGTTTGGCCTTGGTAAGCCATCTGGTTGAACTCTT -3921 -1460 GTGTACAGATGTGTGTGTGTAGTTCTATGTACGCCCATGTGCACACTGTGTGCAGGTGTGTG -1401

-3920 GGAAAGTTAAATTTCTCTACATCGATGTCAGCAACAAGATATGAGCC**TTCA**CAAGAA -3861 -1400 GGGATGTGTGTGTGCAGGTCTGTGTGTGCAGTTGTGTGTG**CAGACATGCATGTGTGTGCA** -1341

-3860 TCCACCATGGTGCCATTTCCAGCAGCCTTCGTGAGCCACCTGCTTGGCTCTTGGGAGA -3801

-3800 TAACCTTCTCTACATCAATTTGGAGAGAGGCAGCATGCTACAGTTTGGATACGGTTTGT -3741

-3740 TTGGTCTGCCAGGTTTCATGTTGAAATTTGACCCCTGTGTGGTAGGTGGGACCTGGTG -3681

-3680 GGAGATGTTTAAACCATGTGGTGAAATCCCGTATGAAATGGCTTGGTCTGCCCCATAGT -3621

-3620 CATGAGTGAGTTCTCATTTCTCAGTTTCCAGGAGAGCTGG**TTGTTGAAAA**GACCCTGGCAC -3561

-3560 CTCCCCCGCTCTCTCTTGCCTTCTTCTGCCATGTGGTCTCTCCACACACAATGTCTT -3501

-3500 CCCTTCACTTTCTGTCACTGACTGGAAGCAGCGTGACGTCTCACCACAAGCAGGTCCAAA -3441

-3440 CACCACGCTTCTTGGACAACCTGGAGAACCCTATGAGCCGAATAAATAATCTCTTTTTT -3381

-3380 TTTTTACC**TTTTTTAAAA**TTTTATTTATTTATACTTTAAGTTCTAGGGTACGTGTGC -3321

-3320 ACAACGTGCAGCTTTGTTACATATGTATCCATGTGCCATGTTGGTGTGCTGCACCCATTA -3261

-3260 ACTCGTCATTTAGCATTAGGTATGTCTCCTAATGCTGTCCCTCCCCCTCCCCCACCCC -3201

-3200 ACAACAGTCCCCGGTGTGTGATGTTCCCTTCTCTGTGTCATGTGTTCTCATGGTTCAAT -3141

-3140 TCCCACCTATGAGTGAGAACATGCGGTGTTTGGTTTTTTGCTTTCGATAGTTTGTCTCA -3081

-3080 GAATGATGGTTTTCCAGCTTCAACCTGTCCCTACAAGGACATGAACCTCATATGTTTTA -3021

-3020 TGCTGCATAGTATCCATGGTGTATATGTGCCACA**TTTTCTTAA**TCCAGTCTATCGTTG -2961

-2960 TTGGACATTTAGG**TGGTCCAA**GTCTTTGCTATTGTGAATAGTGCCATTATAAACATAT -2901

-2900 GTGTGCATGTGCTTTTATAGCAGCATGATTTATAATCTTCTTTTTTTTTTTGAGACACAGT -2841

-2840 CTCGCTCTGTCCCGGGCTGGAGTGCAGTGGCAGCATCTCGGCTCACTGCAAGCTCCGCC -2781

-2780 TCCCGGTTCAAATGATTTCTCTGCTCAGCTTCCAAGTAGCTGGGACTGCAGGTGCAC -2721

-2720 GCCACCACCCAGCTAATTTTTGTATTTTTAGTAGAGATGGGGTTTTACCATGTTFGCC -2661

-2660 AGGCTGGTCTTGATCTCTTGACCTCATGATCCGCCTGCCTCGGCTCTCCAAAAGTCTGGG -2601

-2600 ATTACAGCGGTGAGCCACCGCGCCAGCCAATGATCTTCTTTATCAA**TTACCCAA**CTT -2541

-2540 CAGGATATCC**TTTCAGCAA**CATGAATGGACTAAGACAGCTCCTGCAGGAATGGGGAGCC -2481

TG Rich Sequence

-1340 GGTGTGTGTGCAGGTGTGCGTGTGTAGACAAGTGTGTGTGCCATTGTGCTTGTTTGTG -1281

-1280 CAGACGTCAGTGCAGGTGTGTGTGCAGATGTGTGTGTGTAGCTGTGTGTACACACATGTG -1221

-1220 CCTGTGTGCAGGTGTGTGGGATGTGTGCAGCAGTGTGTGTGTGCAGACATGCATGTGC -1161

-1160 CTGCAGAAAGTGGGGATGTGTGAGTGTGCAGGTCTGTGTGTGCAGATGTGTTTGCAGAC -1101

-1100 GTATGTGTGTGCAGGTGTGTGTGCAGGACTGTGCCAGTGTGCTTGTTTGTGCAGATGTGT -1041

-1040 GTGCAGATGTGTGTGTAGCTGTGTGTACGCCCGTGTGCACGTGTGTGCAGGTGTGTGGGA -0981

-0980 TGTGTGTGCAGTTGTGTGTGCAGACATGCATGTGTGTGCAGGTGTGTGCCAGATGTGTG -0921

-0920 TGTAGTTGTGTGTATGCACATGTGCATTTGTGTGCAGGTGTGTGGGATGTGTGTGCAGGT -0861

-0860 CTGTGTGTGCAGATGTGTGTGCAAAACATGCATGTGTGTGCAGGTGTGTGTGCAGATGTGC -0801

-0800 GTGTGTAGACAAGTGTGTGTGCCATTGTGCTTGTTTGTGCAGACGTACGTGCAGGTGTGT -0741

-0740 GTGCAGATGTGTGTGTGTAGCTGTGTGTACACACATGTGCCCTGTGTGCAGGTGTGTGGG -0681

-0680 GATGTGTGCAGCAGTCTGTGTGTGCAGACATGCATGTGCCTGCAGGAAAGTGGGGATGTG -0621

-0620 TGTGTGTGCAGGTGTGTGTGCAGATGTGTGTGCAGACATGATGTGTGTGTGCAGGTGTG -0561

-0560 TGTGCAGGACTGTGCCAGTGTGCTTGTTTGTGCAGATGTGTGTGCAGATATGTGTGTAGC -0501

-0500 TGTGTGTATGCCCATGTGCACGTGTGTGCAGGTGTGTGGGATGTGTGTGTGCAGGTCTGT -0441

-0440 GTGTGCAGTTGTGTGTGCAGACATGCATATGTGTGCAGGTGTGTGTGCAGATGTGTGTGT -0381

-0380 AGCTGTGTGTACGCCCTGTGCCACTGTGTGCAGGTGTGTGGAGATGTGTGTGTGTGCAGG -0321

-0320 TCTGTGTGCAGGTGTGTGTGCACAAACATGCACACGCTGCAAGCATGTGTGTGCAGAGTG -0261

-0260 TGTGTGCACGTGTGTGCGGGCGTGTGGAAATGTGTGCGTGTGCAGGTCTGTGTGTGCAGA -0201

-0200 TGTGTGTGCAGACATACATGTGTGTGCAGGTGTGTGTGTGTAGATGTGTGTGGGACTCAC -0141

-0140 ACTTGAGCTGTTCCACGGGCCAGTCTTTGGAGACAGGTCAGGAGCCAATGAACTCACGG -0081

-0080 AGCAATTACAGG**TTTCCCAA**TCTATGAAATGAGGAAGCAGGGGAGGGGAGGGGAGGGAG -0021

-0020 TGTATGATGACACAGAGAACTCTG**AGGGAGCTACTCAGAAAGCGGAGTCTCCGAGAGA** +0040

Fig. S3

-3920 GGAAAGTTAAATTTCTCTACATCGATGTCAGCAACAAAGTATGAGCCATTCACAAGAA GA -3861  
-3860 TCCACCATGGTGGCCATTTCCAGCAGCCTTCGTGAGCCACCTGCTTGAGCTCTTGGGAGA -3801  
-3800 TAACCTTCTCTACATCAATTTCTGGAGAGAGGCAGCATGCTACAGTTTGGATACGGTTTGT -3741  
-3740 TTGGTCCCTGCCAGGTTTCATGTTGAAATTTGACCCCTGTGTGGTAGGTGGGACCTGGTGT -3681  
-3680 GGAGATGTTTAAACCATGTGGGTGAATCCCCTATGAATGGCTTGGTCTGCCCCCATAGT -3621  
-3620 CATGAGTGAGTTCTCATTTCTCAGTTTCCAGGAGAGCTGGTTGTTGAAAA GACCCTGGCAC -3561  
-3560 CTCCCCCGCTCTCTCTTGCTTCTTTCTGCCCATGTGGTCTTCTCCACACACAATGTCTT -3501  
-3500 CCCTTCACTTTCTGTCTACTGACTGGAAGCAGCGTGACGTCC1 CACAAGCAGGTCCAAA -3441  
-3440 CACCACGCTTCCCTGGACAACCTGGAGAACCCTATGAGCCGAATAAATAATCTCTTTTTT -3381  
-3380 TTTTTACC TTTTTTAAAAA TTTTATTATTATTATACTTTAAGTTCTAGGGTACGTGTGC -3321  
-3320 ACAACGTGCA TGTTACATATGTATCCATGTGCCATGTTGGTGTGCTGCACCCATTA -3261  
-3260 ACTCGTCATT 2 ATTAGGTATGTCTCCTAATGTCTGCCCTCCCCCTCCCCCACCCT -3201  
-3200 ACAACAGTCCCCGGTGTGTGATGTTCCCTTCTGTGTCATGTGTTCTCATGGTTCAAT -3141  
-3140 TCCCACCTATGAGTGAGAACATGCGGTGTTTGGT TTTTGTCCCTTCCGATAGTTTGTCTCA -3081  
-3080 GAATGATGGTTTCCAGCTTCAACCTGTCCCTACAAAGGACATGAACCTCATCATGTTTTA -3021  
-3020 TGGCTGCATAGTATCCATGGTGTATATGTGCCACA TTTTCTTAA TCCAGTCTATCGTTG -2961  
-2960 TTGGACATTTAGG TGGTTCCAA GTCCTTGTCTATTGTGA TTAGTGCCATTATAAACATAT -2901  
-2900 GTGTGCATGTGCTTTATAGCAGCATGATTTATAATCT 3 TTTTTTTTGTAGACACAGT -2841  
-2840 CTCGCTCTGTGCGCCGGCTGGAGTGCAAGTGGCAGCATCTCGGCTCACTGCAAGCTCCGCC -2781  
-2780 TCCCGGTTCAATTGATTTCTCTGCTCAGCTTCCAAGTAGCTGGGACTGCAGGTGCAC -2721  
-2720 GCCACCACCCAGCTAATTTTGTATTTTGTAGTAGAGATGGGGTTTACCATGTTGGCC -2661  
-2660 AGGCTGGTCTTGATCTCTTGACCTCATGATCCGCCTGCTCGGTCTCCCAAAGTCTGGG -2601  
-2600 ATTACAGCGTGTAGCCACCGCGCCAGCCAATGATCTCTTTTATCAA TTACCCAA CCT -2541  
-2540 CAGGTATTCC TTTCAGCAA CATGAATGGACTAAGACAGCTCTGCAAGAA TGGAGGC -2481  
-2481

TG Rich Sequence

-1340 GGTGTGTGTGCAGGTGTGCGTGTGTAGACAAGTGTGTGTGTGCCATTGTGCTTGTTTGTG -1281  
-1280 CAGACGTACGTGCAGGTGTGTGTGCAGATGTGTGTGTGTAGCTGTGTGTACACACATGTG -1221  
-1220 CCTGTGTGTGCAGGTGTGTGGGGATGTGTGCGCACGCTGTGTGTGCAGACATGCATGTGC -1161  
-1160 CTGCAGGAAAGTGGGGATGTGTGAGTGTGCAGGTCTGTGTGTGCAGATGTGTTTGCAGAC -1101  
-1100 GTATGTGTGTGCAGGTGTGTGTGCAGGACTGTGCCAGTGTCTTGTTTGTGCAGATGTGT -1041  
-1040 GTGCAGATGTGTGTGTAGCTGTGTGTACGCCCCGTGTGCACTGTGTGCAGGTGTGTGGGGA -0981  
-0980 TGTGTGTGCAGTGTGTGTGCAGACATGCATGTGTGTGCAGGTGTGTGCGCAGATGTGTG -0921  
-0920 TGTAGTTGTGTGTATGCACATGTGCATTGTGTGCAGGTGTGTGGGGATGTGTGTGCAGGT -0861  
-0860 CTGTGTGTGCAGATGTGTGTGCAAACATGCATGTGTGTGCAGGTGTGTGTGCAGATGTGC -0801  
-0800 GTGTGTAGACAAGTGTGTGTGCCATTGTGCTTGTTTGTGCAGACGTACGTGCAGGTGTGT -0741  
-0740 GTGCAGATGTGTGTGTGTAGCTGTGTGTACACACATGTGCCCTGTGTGCAGGTGTGTGGG -0681  
-0680 GATGTGTGCGCACGCTCTGTGTGTGCAGACATGCATGTGCCCTGCAGGAAAGTGGGGATGTG -0621  
-0620 TGAGTGTGCAGGTCTGTGTGTGCAGATGTGTGTGCAGACATGTATGTGTGTGCAGGTGTG -0561  
-0560 TGTGCAGGACTGTGCCAGTGTGCTTGTTTGTGCAGATGTGTGTGCAGATATGTGTGTAGC -0501  
-0500 TGTGTGTATGCCCATGTGCACCTGTGTGCAGGTGTGTGGGGATGTGTGTGTGCAGGTCTGT -0441  
-0440 GTGTGCAGTTGTGTGTGCAGACATGCATATGTGTGCAGGTGTGTGTGCAGATGTGTGTGT -0381  
-0380 AGCTGTGTGTACGCCCCGTGCGCACTGTGTGCAGGTGTGTGGAGATGTGTGTGTGCAGG -0321  
-0320 TCTGTGTGTGCAGGTGTGTGTGCAAACATGCACACCGCTGCAAGCATGTGTGCAGGAGTG -0261  
-0260 TGTGTGCACGTGTGTGCGGGCGTGTGGAAATGTGTGCGTGTGCAGGTCTGTGTGTGCAGA -0201  
-0200 TGTGTGTGCAGACATACATGTGTGTGCAGGTGTGTGTGTGTAGATGTGTGTGGGACTCAC -0141  
-0140 ACTTGAGCTGTTCCACGGGCCAGTCTTTGGAGACGAGGTCAGGAGCCAATGAACTCACGG -0081  
-0080 AGCAATTACAGG TTCCCAA TCCATGAAATGAGGAAGCAGGGGAGGGGAGGGGAGGGGAG -0021  
-0020 TGTATGATGACAC TGGAACTCTGAAGGGAGCTACTCAGAAGCGGGAGTCTCCGAGAGA +0040

1

2

3

4

5

# Fig. S4

HSP71\_HUMAN  
Heat shock 70 kDa protein 1A/1B OS=Homo sapiens GN=HSPA1A PE=1 SV=5

K2C1\_HUMAN  
Keratin, type II cytoskeletal 1 OS=Homo sapiens GN=KRT1 PE=1 SV=6

K1C9\_HUMAN  
Keratin, type I cytoskeletal 9 OS=Homo sapiens GN=KRT9 PE=1 SV=3

K1C10\_HUMAN  
Keratin, type I cytoskeletal 10 OS=Homo sapiens GN=KRT10 PE=1 SV=6

K2C6A\_HUMAN  
Keratin, type II cytoskeletal 6A OS=Homo sapiens GN=KRT6A PE=1 SV=3

K2C6B\_HUMAN  
Keratin, type II cytoskeletal 6B OS=Homo sapiens GN=KRT6B PE=1 SV=5

HSP7C\_HUMAN  
Heat shock cognate 71 kDa protein OS=Homo sapiens GN=HSPA8 PE=1 SV=1

GRP78\_HUMAN  
78 kDa glucose-regulated protein OS=Homo sapiens GN=HSPA5 PE=1 SV=2

K2C5\_HUMAN  
Keratin, type II cytoskeletal 5 OS=Homo sapiens GN=KRT5 PE=1 SV=3

K22E\_HUMAN  
Keratin, type II cytoskeletal 2 epidermal OS=Homo sapiens GN=KRT2 PE=1 SV=2

FUBP2\_HUMAN  
Far upstream element-binding protein 2 OS=Homo sapiens GN=KHSRP PE=1 SV=4

TRAP1\_HUMAN  
Heat shock protein 75 kDa, mitochondrial OS=Homo sapiens GN=TRAP1 PE=1 SV=3

K1C14\_HUMAN  
Keratin, type I cytoskeletal 14 OS=Homo sapiens GN=KRT14 PE=1 SV=4

KRT84\_HUMAN  
Keratin, type II cuticular Hb4 OS=Homo sapiens GN=KRT84 PE=1 SV=2

TRI25\_HUMAN  
E3 ubiquitin/ISG15 ligase TRIM25 OS=Homo sapiens GN=TRIM25 PE=1 SV=2

CSF2R\_HUMAN  
Granulocyte-macrophage colony-stimulating factor receptor subunit alpha OS=Homo sapiens GN=CSF2RA PE=1 SV=1

PABP1\_HUMAN  
Polyadenylate-binding protein 1 OS=Homo sapiens GN=PABPC1 PE=1 SV=2

ALBU\_HUMAN  
Serum albumin OS=Homo sapiens GN=ALB PE=1 SV=2

TIF1B\_HUMAN  
Transcription intermediary factor 1-beta OS=Homo sapiens GN=TRIM28 PE=1 SV=5

CH079\_HUMAN  
Uncharacterized protein KIAA1456 OS=Homo sapiens GN=KIAA1456 PE=2 SV=1

SPIR1\_HUMAN  
Protein spire homolog 1 OS=Homo sapiens GN=SPIRE1 PE=1 SV=2
